1 Red and black: A  $\beta$ -carotene-binding protein carrying a red pigment  
2 regulates body-color transition in locusts

3 **Meiling Yang<sup>1†</sup>, Yanli Wang<sup>2†</sup>, Qing Liu<sup>1†</sup>, Zhikang Liu<sup>1</sup>, Feng Jiang<sup>3</sup>, Huimin**  
4 **Wang<sup>3</sup>, Xiaojiao Guo<sup>1</sup>, Jianzhen Zhang<sup>2\*</sup>, Le Kang<sup>1,3\*</sup>**

5 <sup>1</sup>State Key Laboratory of Integrated Management of Pest Insects and Rodents,  
6 Institute of Zoology, Chinese Academy of Sciences, Beijing 100101, China

7 <sup>2</sup>Institute of Applied Biology, Shanxi University, Taiyuan 030006, Shanxi, China

8 <sup>3</sup>Beijing Institutes of Life Science, Chinese Academy of Sciences, Beijing  
9 100101, China

10 **Running head:  $\beta$ CBP regulates the body color change of locusts**

11 **† These authors contributed equally to this study.**

12 **\* Corresponding author**

13 Le Kang, Ph.D. and Professor

14 Institute of Zoology, Chinese Academy of Sciences

15 Beijing 100101, China

16 Tel.: 86-10-6480-7219

17 Fax: 86-10-6480-7099

18 E-mail: [lkang@ioz.ac.cn](mailto:lkang@ioz.ac.cn)

19

20

## Abstract

Changes of body color have important effects for animals in adapting to variable environments. The migratory locust exhibits body color polyphenism between solitary and gregarious individuals, with the former displaying a uniform green coloration and the latter having a prominent pattern of black dorsal and brown ventral surface. However, the molecular mechanism underlying the density-dependent body color changes of conspecific locusts remain largely unknown. Here, we found that up regulation of  $\beta$ -carotene-binding protein promotes the accumulation of red pigment, which added to the green color palette present in solitary locusts changes it from green to black, and that down regulation of this protein led to the reverse, changing the color of gregarious locusts from black to green. Our results provide insight that color changes of locusts are dependent on variation in the red  $\beta$ -carotene pigment binding to  $\beta$ CBP. This finding of animal coloration corresponds with trichromatic theory of color vision.

## Introduction

Body color change is a ubiquitous but highly diverse phenomenon of adaptive significance to animals under exposure to illnesses, environmental changes, predation, and sexual signals (*Burmeister et al., 2005; Henderson et al., 2016; Mathger, 2003; Stuart-Fox and Moussalli, 2008; Teyssier et al., 2015*). Seasonal switching between color phases in response to extrinsic environmental factors is common in arthropods (*Futahashi and Fujiwara, 2008;*

*Futahashi et al., 2012; Moran and Jarvik, 2010*). However, rapid and reversible color change is a rare trait regulated by endogenous and exogenous mechanisms (*Cuthill et al., 2017; Hubbard et al., 2010*). This type of phenotypic plasticity has not been well investigated.

Rapid body color change in arthropods such as aphids, locusts and grasshoppers, lepidopteran caterpillars, and spider mites is influenced by environmental changes, especially by changes in population density (*Bryon et al., 2017; Tabadkani et al., 2013; Valverde and Schielzeth, 2015; Wang and Kang, 2014; Xiong et al., 2017*). Locust body color changes are of particular interest because conspecific color change coincides with changes in population density as well as behavioral changes; specifically, dramatic individual color change from green to black occurs when locusts form agriculturally destructive swarms (*X. Wang et al., 2014; Wang and Kang, 2014; Wu et al., 2012b*). Similar to that of other animals (*Cuthill et al., 2017; Duarte et al., 2017*), the coloration of locusts serves as a dynamic form of population information.

Phenotypic plasticity in the migratory locust *Locusta migratoria* underlies the transition between the gregarious and solitary phases, which are dependent on population density changes (*Guo et al., 2011; Kang et al., 2004; Ma et al., 2011; Wu et al., 2012a; Yang et al., 2014*). In addition to behavioral differences between the two phases of locusts (*Kang et al., 2004; Ma et al., 2011; Yang et al., 2014*), remarkable body color changes between gregarious and solitary locusts occur. Solitary locusts found at low population densities have a uniform

green coloration, whereas gregarious locusts develop a striking color pattern of a black back with a contrasting brown ventral color (*Pener, 1991; Wang and Kang, 2014*).

The black-brown pattern of gregarious locusts is recognized as mainly being induced under high-density crowding conditions (*Pener, 1991*). Regarding the regulatory mechanism, juvenile hormones reportedly induce solitary green cuticular coloration in locusts (*Applebaum et al., 1997; Tanaka, 1993*). However, the regulatory function of these hormones during phase change remains controversial (*Wang and Kang, 2014*). The neuropeptide [His7]-corazonin induces a dark coloration of the whole body in locusts but does not regulate the phase-related black–brown color pattern in gregarious locusts (*Tanaka, 2000; Wang and Kang, 2014*). Silencing the *ebony* and *pale* genes in the dopamine pathway that leads to the synthesis of dopamine melanin can result in partial fading of the black color in gregarious locusts, but the exogenous injection of dopamine does not completely lead to the black pattern (*Ma et al., 2011*). Thus, the body color pattern of gregarious locusts is not the result of pure melanization.

The green color of solitary locusts is likely due to the presence of a combination of yellow and blue pigments (*Pener and Simpson, 2009*) that facilitate the camouflage of low-density locusts in the background of plants. In the present study, we investigated whether the black coloration of gregarious locusts results from the addition of pigments to the solitary green background.

We used strand-specific high-throughput RNA sequencing to monitor genome-wide transcriptional expression profiles and detect differentially expressed genes (DEGs) correlated with color polymorphism. We found a key DEG that encodes  $\beta$ -carotene-binding protein ( $\beta$ CBP), which promotes body color change associated with phase-related coloration. The manipulation of the gene expression by RNAi and feeding of  $\beta$ -carotene led to the reverse of body color of the locusts. The results of our study reveal that the black–brown coloration pattern in gregarious locusts is formed by the presence of the red color  $\beta$ -carotene pigment– $\beta$ CBP protein complex in the green-colored background of solitary locusts. This work provides novel insights into the molecular mechanisms of body color changes in response to population density changes in accordance with the corresponding environmental changes.

## Results

### **Gregarious and solitary locusts have different expression levels of $\beta$ CBP**

Gregarious and solitary locusts were reared either in crowded conditions or in solitude as previously described (*Ma et al., 2011*). These locusts displayed phase-specific phenotypes of body coloration. The gregarious locusts exhibited intense black patterns with a ventral brown color, and the solitary locusts showed the expected uniform green coloration (*Figure 1A*).

The body coloration of gregarious locusts is characterized as a black tergum of the thorax and abdomen, in particular, a very black pronotum. To delineate gene activity changes potentially associated with the regulation of

phase-dependent body color traits, we performed transcriptome sequencing on pronotum integuments of gregarious and solitary locusts. We identified a total of 1653 DEGs between the gregarious and solitary locusts (*Figure 1—figure supplementary 1A*), and 26% (430) of these DEGs were protein-coding genes (*Figure 1—figure supplementary 1B*). Gene ontology analysis of these 430 protein-coding DEGs indicated that many of them encode cuticle metabolism-related proteins involved in chitin metabolic, melatonin metabolic, transport, and catecholamine catabolic activities (*Figure 1—figure supplementary 1C*).

Sixty-eight of the 430 protein-coding DEGs are involved in pathways associated with animal coloration (*Figure 1B*). The top 17 DEGs (Log FC > 2.8, FDR < 1e-5) of these 68 genes were used to validate the differential expression patterns between the gregarious and solitary locusts via qPCR (*Figure 1C*). Nine of the 17 genes showed higher transcriptional levels in the pronotum integuments of the gregarious locusts than in those of the solitary locusts, and the transcriptional levels of 6 of the 17 genes were significantly lower in the gregarious locusts than in the solitary locusts (*Figure 1C*). These results are consistent with the transcriptome data. Among the 17 genes, we investigated the top 8 DEGs, among which 6 had higher expression in the gregarious locusts and 2 had higher expression in the solitary locusts, to screen the key candidate genes involved in the color change.

To explore whether these 8 genes regulate body color plasticity during locust phase transition, we carried out transcript knockdown analyses of these

genes in the gregarious and solitary locusts. Out of the 8 genes, only  $\beta CBP$  showed a significant effect on the regulation of body color transition when it was silenced. After molting, the dark pattern in the pronotum decreased markedly in 60% of the gregarious locusts after  $\beta CBP$  knockdown (*Figure 1—figure supplementary 2*). These data imply that  $CBP$  serves as a key gene involved in body color change.

### **Phase-related characteristics of the $\beta CBP$ gene in integument**

To investigate the correlation of  $\beta CBP$  expression level with the degree of black body coloration of the locust integument, we performed quantitative reverse transcriptase–polymerase chain reaction (qRT–PCR) and found that  $\beta CBP$  was predominantly expressed in the locust integument tissue (*Figure 2—figure supplementary 1*). Furthermore, consistent with the deeper black color of the pronotum than of the tergum of the thorax and abdomen in gregarious locusts, we found that  $\beta CBP$  expression was significantly higher in the pronotum than in the tergum integuments of the thorax and abdomen in gregarious locusts, whereas little  $\beta CBP$  expression was observed in the terga of solitary locusts, with no variability among the tergum segments (*Figure 2A*). Because the black coloration of gregarious locusts gradually increases with nymph developmental stage, we also quantified the  $\beta CBP$  transcript levels in the pronotum of different developmental stages of the gregarious locusts. The  $\beta CBP$  transcript level increased with developmental stage, with the expression levels of 4<sup>th</sup> instar gregarious locusts being approximately 200 times those of the 2<sup>nd</sup> and 3<sup>rd</sup> instar

gregarious locusts. By contrast,  $\beta$ CBP expression was invariable across the developmental stages in solitary locusts (*Figure 2B*). Therefore, the extent of black body coloration in locusts is positively correlated with  $\beta$ CBP expression level.

To explore whether  $\beta$ CBP is especially expressed in the black tergum integuments of gregarious locusts, we performed a comparative analysis via qRT-PCR to quantify the  $\beta$ CBP transcript levels in the tergum integuments of solitary and gregarious locusts. The transcript level of  $\beta$ CBP was significantly higher in the pronotum and tergum integuments of the thorax and abdomen of gregarious individuals than the pronotum and tergum integuments of solitary individuals (*Figure 2C* and *Figure 2—figure supplementary 3*). Moreover, isolating the gregarious locusts (IG) significantly decreased the transcript level of  $\beta$ CBP (*Figure 2C* and *Figure 2—figure supplementary 2, 3*). By contrast, crowding the solitary locusts (CS) significantly increased the transcript level of  $\beta$ CBP (*Figure 2C* and *Figure 2—figure supplementary 3*).

Because the expression pattern of  $\beta$ CBP in the pronotum was consistent with that in the tergum of the thorax and abdomen, the pronota were considered representative of all terga of locusts in the following analyses. We also found that the level of CBP protein in the locust pronotum integuments was significantly higher in the gregarious locusts than in the solitary locusts (*Figure 2D*). Moreover, the protein levels of  $\beta$ CBP declined when the locusts were isolated and increased under the crowding conditions (*Figure 2D*). This



expression pattern suggests a potential role of  $\beta$ CBP in regulating the body color characteristics of the pronotum and tergum integuments of the thorax and abdomen.

To determine whether  $\beta$ CBP is differentially localized in the locust pronotum integuments of gregarious and solitary locusts, we performed immunohistochemistry of  $\beta$ CBP. We found that large amounts of  $\beta$ CBP were widely detected in the intercellular space of the pronotum of gregarious locusts, whereas  $\beta$ CBP was distributed very sporadically in the solitary locusts (*Figure 2E*). The amount of  $\beta$ CBP protein in the pronotum of gregarious locusts was 39.5-fold higher than the corresponding amount in solitary locusts (*Figure 2G*). Furthermore, the amount of  $\beta$ CBP protein in the locust pronotum was decreased by isolation and increased by crowding (*Figure 2F and G*).

Considering that  $\beta$ CBP can bind and accumulate  $\beta$ -carotenes in tissues (*Bhosale and Bernstein, 2007*), we assessed the amount of  $\beta$ -carotene binding by  $\beta$ CBP in the pronotum integuments of gregarious and solitary locusts in vivo. The  $\beta$ -carotene content in the gregarious locusts was 2.8-fold higher than that in the solitary locusts (*Figure 2H*). These results suggest that  $\beta$ CBP protein level and the associated  $\beta$ -carotene content are directly correlated with the degree of black coloration of the locust pronotum.

### **$\beta$ CBP mediates body color changes associated with population density**

Based on the high level of  $\beta$ CBP available to bind with  $\beta$ -carotenes in gregarious locusts or crowded solitary locusts, we hypothesized that the black

gregarious locusts could be induced towards green body color by blocking  $\beta$ CBP synthesis to interfere with  $\beta$ -carotene deposition. To confirm the involvement of  $\beta$ CBP in pigmentation during the phase transition, we injected double-stranded RNAs (dsRNAs) against the  $\beta$ CBP gene into the abdominal hemocoel of gregarious nymphs at the second stadium, isolated the injected locusts, and assessed their body color pattern.

After injection of *ds $\beta$ CBP*-RNA and isolation treatment, the mRNA and protein levels of  $\beta$ CBP in the pronotum integument decreased by 99% and 85%, respectively, relative to the levels in *dsGFP*-RNA-injected and isolated controls (*Figure 3A and C*). In addition, the mRNA levels of  $\beta$ CBP in the tergum of the thorax and abdomen decreased by 98% relative to the levels in *dsGFP*-RNA-injected and isolated controls (*Figure 3—figure supplement 1*). The silencing effect of *ds $\beta$ CBP*-RNA resulted in an 80% decrease in the signal intensity of  $\beta$ CBP in the pronotum integuments of gregarious locusts relative to the corresponding intensity in the *dsGFP*-RNA injected controls (*Figure 3E and F*).

We then determined the effects of  $\beta$ CBP silencing on the  $\beta$ -carotene content in the pronotum integuments of locusts. Because there are many free  $\beta$ -carotenes in locusts and  $\beta$ -carotene only binds with the  $\beta$ CBP protein to participate in the formation of body color, we measured the amount of  $\beta$ -carotene binding to  $\beta$ CBP. The administration of *ds $\beta$ CBP* significantly reduced the  $\beta$ -carotene content in the pronotum integuments from 104.8 ug/g to 74.3 ug/g (*Figure 3H*).

A body coloration assay revealed that after molting of 29 locusts, 48% of the nymphs injected with ds $\beta$ CBP–RNA and then isolated showed substantial lightening of the black pronotum. Moreover, 41% of the gregarious nymphs shifted to a complete green-colored body. By contrast, 73% of the *dsGFP*–RNA-injected gregarious nymphs treated with isolation retained an intense black body pattern. Only 27% of the *dsGFP*-injected and isolated control locusts showed body color lightening (*Figure 4A*). These results support the view that  $\beta$ CBP regulates the body color changes of gregarious and solitary locusts between black and green coloration.

To further confirm the direct involvement of  $\beta$ CBP in mediating body color changes, we assessed the effect of increasing the pigment bound with  $\beta$ CBP on the body color change of locusts from solitary to gregarious phase. In this experiment, solitary locusts were fed a diet containing  $\beta$ -carotene and treated with crowding. The mRNA and protein levels of  $\beta$ CBP significantly increased by 11.2- and 2.5-fold in the pronotum, respectively, and increased by 2.3- and 2.1-fold in the tergum of the thorax and abdomen, respectively, relative to the corresponding levels in the regular diet-fed and crowded controls (*Figure 3B, D* and *Figure 3—figure supplement 2*). Moreover, the signal intensity of  $\beta$ CBP increased by 22.7-fold in the pronotum integument cells of the solitary locusts after  $\beta$ -carotene feeding and crowding relative to the intensity in the regular diet-fed and crowded controls (*Figure 3E and G*). In addition, HPLC analysis revealed that the amount of  $\beta$ CBP– $\beta$ -carotene complex in the solitary

integuments increased by 3.4-fold after  $\beta$ -carotene feeding and crowding (Figure 3H). A total of 47% of the solitary locusts completely shifted to the typical gregarious body color, and the pronota of 33% of the feeding locusts developed extensive black areas similar to the gregarious body color after feeding with  $\beta$ -carotene and crowding. However, 87% of the locusts retained their green color in the regular diet and crowding treatment (control group) (Figure 4B). Thus,  $\beta$ CBP and  $\beta$ -carotene can jointly induce body color changes from green to black associated with phase transition in locusts.

To further determine whether the  $\beta$ CBP upregulation induced by  $\beta$ -carotene is responsible for the body color change of locusts from green to black, we conducted a rescue experiment by injecting *ds $\beta$ CBP*-RNA into solitary locusts pre-fed with  $\beta$ -carotene. After molting, 35.5% of the *ds $\beta$ CBP*-injected nymphs pre-fed with  $\beta$ -carotene showed green body color, whereas 15.6% of the green individuals in the *dsGFP*-injected group pre-fed with  $\beta$ -carotene did so. Correspondingly, the phenotype of black tergum individuals induced by  $\beta$ -carotene was rescued only by injection with *ds $\beta$ CBP*-RNA (Figure 4C). Therefore,  $\beta$ CBP acts with  $\beta$ -carotene to regulate the black body color of gregarious locusts.

### **Body color change from green to black is mediated by the red pigment complex**

To confirm the role of the  $\beta$ CBP–pigment complex in black color pigmentation, we performed a pigment immunoprecipitation assay using an antibody against

the  $\beta$ CBP protein in vitro and in vivo to examine the binding capacity and complex coloration of  $\beta$ CBP with  $\beta$ -carotene (*Figure 5A and B*). We incubated recombinant  $\beta$ CBP (r $\beta$ CBP) with  $\beta$ -carotene under immunoprecipitation by using  $\beta$ CBP antibody conjugated with protein A-Sepharose (*Figure 5A*). Immunoprecipitation of  $\beta$ -carotene-r $\beta$ CBP formed a red complex, whereas no red precipitate formed when  $\beta$ -carotene was added to bovine serum albumin (BSA) or when  $\beta$ -carotene in the absence of r $\beta$ CBP was incubated in the binding buffer followed by immunoprecipitation (*Figure 5A*). It could be inferred that the red precipitate was specific to the r $\beta$ CBP- $\beta$ -carotene complex because this complex failed to form in the presence of BSA and  $\beta$ -carotene or in the absence of r $\beta$ CBP (*Figure 5A*). The pigment immunoprecipitation assay in vivo also showed an accumulation of red pigment in the precipitate of the integument when treated with anti- $\beta$ CBP-immunoprecipitation compared with IgG-immunoprecipitation (*Figure 5B*). Furthermore, we confirmed that the red pigment in the  $\beta$ CBP precipitant result from  $\beta$ -carotene by HPLC analysis (*Figure 5—Figure supplement 1*). These results provide strong evidence that  $\beta$ CBP directly binds with  $\beta$ -carotene in the pronotum integument to form the red complex, which directly contributes to the black pattern of the pronotum in gregarious locusts.

### **$\beta$ CBP is localized to the pigment granules of the pronotum integument**

To verify the co-location of  $\beta$ CBP and the pigment granules, we investigated the subcellular distribution of  $\beta$ CBP using immunoelectron microscopy. The

pronotum integuments were fixed and embedded for thin sections. The sections were analyzed for  $\beta$ CBP localization by using an anti- $\beta$ CBP antibody followed by a gold-conjugated antibody against rabbit IgG. The gold particles were present mainly in the pigment granules of the pronotum integuments. In addition, the average number of gold particles in the pigment granules from the pronotum integuments was 15.5-fold higher in the gregarious locusts than in the solitary locusts (*Figure 5C and F*). Furthermore,  $\beta$ CBP silencing coupled with isolation caused a severe deficiency of gold particles in the pigment granules of the gregarious locusts, indicating a substantial reduction in the  $\beta$ CBP protein–pigment complex relative to the level in the *dsGFP*-injected and isolated controls (*Figure 5D and G*). By contrast,  $\beta$ -carotene intake coupled with crowding evidently increased the gold particles responsible for the  $\beta$ CBP production in the pigment granules of pronotum in the solitary locusts, demonstrating a significant promotion of  $\beta$ CBP protein–pigment complex accumulation compared with accumulation in the regular diet-fed and crowded controls (*Figure 5E and H*). Thus, the  $\beta$ CBP–pigment complex is a key mediator of black formation in the pronotum integuments of gregarious locusts.

## Discussion

Our study revealed an undescribed mechanism of body color regulation in which changes in the  $\beta$ CBP– $\beta$ -carotene complex-mediated red color balance produce a shift between black and green body color in locusts. The change of body color occurs as an adaptive response to population density change. The

black–brown pattern in the gregarious locusts resulted from the superposition or balancing effect of a red pigment on the green background of solitary locusts rather than complete melanogenesis. Crowding treatment increased the  $\beta$ CBP levels in the integuments and caused body color change in the solitary locusts by the binding of  $\beta$ CBP with  $\beta$ -carotenes (*Figure 6*). This finding of animal coloration corresponds precisely with the physically trichromatic rule.

We demonstrated that  $\beta$ CBP expression is not only positively correlated with the black color of the pronotum in gregarious locusts but also phase-related in response to population density changes. The  $\beta$ CBP expression in solitary locusts was not induced by merely feeding with  $\beta$ -carotene without crowding treatment (*Figure 3—figure supplement 3*). Thus, the body color changes of solitary locusts that were induced to form gregarious-like body coloration must rely on crowding treatment and feeding the  $\beta$ -carotene, because only crowding treatment can promote the  $\beta$ CBP expression for  $\beta$ CBP– $\beta$ -carotene complex production. Thus, population density of locusts acts as necessary and sufficient condition to drive the changes of body coloration. Generally, body color changes are driven by gene changes to adapt with a broad range of environments. For instance, the melanocortin-1 receptor gene regulates melanin production associated with black hair and skin in human and mouse pigmentation responded to ultraviolet-light (*D'Orazio et al., 2006*). The cytochrome P450 gene may encode ketolases that generate red carotenes, as a honest signaling, to control the bright-red coloration of retinal oil droplets in

the zebra finch (*Mundy et al., 2016*). Although several studies have investigated the role of gene-environment in animal coloration, convergent phenotypes commonly arise from a single pigment-mediated independent change. Our study reveals a different mechanism in which  $\beta$ CBP, as a red signaling, has an integrative and palette effect on black and green body color change depending on the population density in locusts .

In our study, single  $\beta$ CBP or  $\beta$ -carotene cannot produce pigment deposition in the black tergum integuments of locusts.  $\beta$ CBP only combine  $\beta$ -carotene to form red pigment complex for producing the black pattern of gregarious locusts. Previous studies in other species have similarly reported that pigment-binding protein can uptake and bind pigment to affect coloration (*Sakudoh et al., 2011; Sakudoh et al., 2007; W. Wang et al., 2014*). In the silkworm *Bombyx mori*, the yellow cocoon color is determined by the carotenoid-binding protein gene, which controls the uptake of carotenoids in the silk gland (*Sakudoh et al., 2007*). *Carotenoid-binding protein* mutation produces colorless hemolymph and white cocoons, indicating that carotenoid-binding protein plays a central role in cocoon color pigmentation (*Sakudoh et al., 2007; W. Wang et al., 2014*). Mammals often obtain carotenoids by eating plants (*Avalos and Limon, 2015; Bryon et al., 2017; Toews et al., 2017*). Once absorbed, carotenoids are transported by lipoproteins, which are homologs of CBP in insects, through the bloodstream to the target tissues. In this process, the abundance and nature of lipoproteins limit the capacity to obtain



carotenoids (McGraw, 2006). As the same,  $\beta$ -carotene-binding protein, as a key mediator of body color production, controls  $\beta$ -carotene content and absorption to produce red color, which is superposed on the background color of gregarious locus to yield the black pattern.

Our results show that the black pattern of gregarious locusts is not caused by an increase in melanin but is caused by the interaction of different pigments. This pigment interaction has a colored palette effect that results in black coloration due to the accumulation of red color  $\beta$ -carotene pigments in the presence of blue and yellow pigments. The disappearance of the red pigment in the gregarious locusts led to the emergence of green color, which is the typical body color of solitary locusts. By elucidating the mechanism by which different types of pigments interact to create transitions among color polymorphisms, this study provides new information that could be useful for analyzing color transitions in other organisms. In *Heliconius erato* and *Agraulis vanillae*, optix is required for the red color pattern and coordinates between the ommochrome (orange and red) and melanin (black and gray) pigment types (Zhang et al., 2017). Parrots acquire their colors through regulatory changes that drive the high expression of MuPKS in feather epithelia, which appear green when the blue and yellow pigments are present (Cooke et al., 2017). The green color of the integument of solitary locusts is obtained from a mixture of blue biliverdin pigment and yellow carotenoids (Goodwin, 1952; Goodwin and Srisukh, 1951). As expected, the expression levels of *biliverdin-binding protein*

and *carotenoid-binding protein* in the pronotum integument were not significantly different between the gregarious and solitary locusts (*Figure 6—figure supplement 1*), suggesting that the contents of blue biliverdin and yellow carotenoid are the same in gregarious and solitary locusts. Thus, our results suggest a colored palette mechanism of body color change, with the change from typical gregarious-phased coloration (black) to solitary-phased coloration (green) is dependent on the extent of red  $\beta$ -carotene bound to  $\beta$ CBP.

The color polymorphism of gregarious and solitary locusts reflects an adaptive strategy to respond to changes in population density and the natural environment (*Simoes et al., 2016*), which is consistent with the strategies of other animals when encountering different selection pressures (*Cuthill et al., 2017*). The contrasting body coloration of gregarious locusts may allow mutual recognition and warning against predators in swarms. In addition, crowding stimuli, including the stress of a high population density and emission of an aggregative pheromone, may induce group migration (*Caro, 2009; Sword, 2002*). By contrast, the uniform cryptic color of solitary locusts may reduce the likelihood of detection and risk of predation, similar to the role of crypsis in other organisms (*Caro, 2009; Hemmi et al., 2006*). Animal coloration is a prominent phenotypical feature that serves multiple important functions, including social signaling, antipredator defense, parasitic exploitation, thermoregulation, and protection from ultraviolet light, microbes, and abrasion (*Bell et al., 2017; Caro et al., 2016; Cuthill et al., 2017; Duarte et al., 2017; Duarte et al., 2016*).

Therefore, the mechanisms of color variation are highly conserved and can offer insights into the adaptive evolution of gene regulation. Our study shows a new "palette effect" mechanism by which the red  $\beta$ CBP- $\beta$ -carotene pigment complex can act as a switch to coordinate between black and green coloration. This mechanism of color pattern change may be evolutionarily conserved among multiple species, although additional functional work is needed to assess this hypothesis.

## **Materials and Methods**

### **Insects**

All insects used in the experiments were reared in the same locust colonies at the Institute of Zoology, Chinese Academy of Sciences, Beijing, China. Gregarious nymphs were reared in large, well-ventilated cages (400 insects per case). Solitary nymphs were cultured alone in white metal boxes supplied with charcoal-filtered compressed air. Both colonies were reared under a 14:10 light: dark photo regime at  $30 \pm 2$  °C (*Kang et al., 2004*).

### **Strand-specific RNA sequencing of the integument**

The pronotum integument was dissected from gregarious or solitary fourth-instar nymphs. Total RNA of the pronotum samples was extracted using TRIzol (Invitrogen) and treated with DNase I following the manufacturer's instructions. RNA quality was assessed using an Agilent 2100 Bioanalyzer (Agilent) to verify RNA integrity. cDNA libraries were prepared according to Illumina's protocols. The adaptor sequences in the raw sequencing data were filtered using

Trimmomatic-0.30 (*Bolger et al., 2014*). We performed the de novo transcriptome assembly by using Trinity software (trinityrnaseq r20140717). Clean reads were mapped to the de novo transcriptome assembly in the accompanying script in Trinity software. The number of total reads was normalized using fragments per kilobase of transcripts per million reads mapped. The significance of differences between the test and control groups was based on  $p$  values with false discovery rate correction. DEGs with significance at corrected  $p < 0.05$  in each comparison were determined using the run\_DE\_analysis in the R environment. The RNA-seq data were deposited in the Sequence Read Archive Database of NCBI (accession no. PRJNA399053).

### **Assays of quantitative PCR for genes**

Total RNA was isolated from the integument by using TRIzol (Invitrogen). The Moloney murine leukemia virus reverse transcriptase (Promega, USA) was used to prepare the oligo (dT)-primed cDNA. mRNAs were subjected to qPCR by using SYBR Green gene expression assays in accordance with the manufacturer's instructions (Tiangen). qPCR was performed on a LightCycler® 480 instrument (Roche).  $\beta$ -actin was used as the internal control. Dissociation curves were determined for each mRNA to confirm unique amplification. The qPCR primers used are listed in *Supplementary files 1*. All of the qRT-PCR reactions were performed in six biological replicates. Four integument samples were used in each biological replicate.

### **βCBP immunohistochemical assay**

βCBP was detected in the integument via immunohistochemistry. The integument was fixed in 4% paraformaldehyde overnight. Paraffin-embedded integument tissue slides (5 μm thick) were deparaffinized in xylene and rehydrated with an ethanol gradient. The samples were blocked with 5% BSA for 30 min and then incubated with an anti-βCBP antiserum (1 : 200) for 2 h. The slides were washed and incubated for 1 h with Alexa Fluor-488 goat anti-rabbit secondary antibody (Life Technologies). Hoechst (1 : 500) was used for nuclei staining. The βCBP signals were detected using an LSM 710 confocal fluorescence microscope (Zeiss).

### **Transcript knockdown via RNAi**

To knockdown the transcript of *βCBP*, dsRNA was synthesized using the T7 RiboMAX<sup>TM</sup> Express RNAi System (Promega, USA) following the manufacturer's instructions. Each insect was injected with 3 μg of dsRNA three times at day 3 for the second-instar nymphs and at days 1 and 5 for the third-instar nymphs. Control nymphs were injected with an equivalent amount of *dsGFP*-RNA. Nymphs that showed body color changes were used for the extraction. Six abnormal nymphs and six control nymphs were used for CBP immunohistochemistry.

### **Feeding β-carotene assay**

Solitary nymphs of 3-day-old second instars were fed with a synthetic diet containing β-carotene and subjected to crowding for two stadiums before

calculating the body color phenotype statistics. The composition of the basic synthetic diet used in the experiment is shown in *Supplementary files 2*. Control insects were fed a synthetic diet without  $\beta$ -carotene and exposed to crowding. Rearing jars were cleaned and fresh diets were provided every day. A total of 29 nymphs were fed a synthetic diet in each of the treatment and control groups.

### **Body color rescue experiment in vivo**

A rescue experiment was performed with solitary locusts. Approximately 30 second-instar nymphs were fed a synthetic diet containing  $\beta$ -carotene and then subjected to crowding. One stadium later, these nymphs were injected with 3  $\mu$ g *ds $\beta$ CBP* or *dsGFP* control and then isolated. One stadium after the dsRNA injection, the nymphs were subjected to body color analysis.

### **Immunoelectron microscopy**

For  $\beta$ CBP immunolabeling, integuments were fixed with 2.5% glutaraldehyde in 0.1 M phosphate buffer. After dehydration in a graded alcohol series, specimens were embedded in LR White resin and polymerized at 60 °C. Ultrathin sections were blocked with phosphate-buffered saline (PBS) containing 1% BSA, 0.2% Tween-20, and 0.2% gelatin before labeling with the CBP polyclonal antibody (1 : 1000). A gold-conjugated (10 nm) secondary rabbit antibody was used to visualize the binding sites through TEM (Ruli H-750, Japan).

### **$\beta$ -carotene binding assay in vitro and in vivo**

A  $\beta$ -carotene-binding experiment in vitro was conducted as previously

described (*Tabunoki et al.*, 2002). Purified r $\beta$ CBP was resuspended in PBS binding buffer containing 1 mg/mL BSA. Samples containing 50 M rCBP and 100 M  $\beta$ -carotene were incubated in 1 mL of binding buffer for 3 h at 25 °C. The control experiments were performed using the same procedure without the use of purified r $\beta$ CBP or BSA. Anti-CBP rabbit IgG–protein A-Sepharose was added to the reaction mixture and incubated for 4 h at 4 °C. The protein A-Sepharose–r $\beta$ CBP– $\beta$ -carotene complex was collected by centrifugation at 13, 000 g for 10 s. To remove the unbound  $\beta$ -carotene, the pellets were washed 5 times with 20 mM Tris-HCl (pH 7.6) containing 150 mM NaCl, 1% Nonidet P-40, protease inhibitor mixture, and 1 mg/mL BSA. Binding of  $\beta$ -carotene to r $\beta$ CBP was confirmed by the presence of red-colored precipitate.

For the  $\beta$ -carotene binding experiment in vivo, approximately 200 pronotum integuments from gregarious individuals were collected and homogenized in ice-cold PBS buffer containing protease inhibitor.  $\beta$ CBP antibody or rabbit IgG, which was used as a negative control, and protein A-Sepharose was added to the homogenate and incubated at 4 °C overnight. The protein A-Sepharose– $\beta$ CBP– $\beta$ -carotene complex was collected by centrifugation at 13, 000 g for 30 s. The pellets were washed five times to remove the unbound  $\beta$ -carotene.

### **$\beta$ -carotene quantification of the pronotum tissue extracts**

The  $\beta$ -carotene content of locust pronotum integument was quantified using reverse-phase HPLC and DAD. Pronotum tissues of locust nymphs were rapidly dissected and stored in liquid nitrogen. Thirty pronotums were

505 homogenized and lysed in lysate buffer. After incubation with  $\beta$ CBP antibody–  
 506 protein A-sepharose at 4 °C overnight, the specimens were placed in a 50 mL  
 507 centrifuge tube containing a mixture of n-hexane, ethanol, and acetone (2 : 1 :  
 508 1, v : v : v). The tissue samples were sonicated at 5–10 °C for 15 min and then  
 509 centrifuged at 6, 800 g for 10 min. The upper layer extract and the ether extract  
 510 of the lower layer residual solution were collected in another centrifuge tube.  
 511 The same sample was re-extracted twice according to the same protocol as  
 512 described above. Then, 2 mL of ether and 2 mL of distilled water were added  
 513 to the lower layer collection tube and sonicated at 4 °C for 5 min. Following, the  
 514 upper phase was collected. All of the extracts were combined and dried using  
 515 a lyophilizer. The dried residue was dissolved in 2 mL of methyl tertbutyl ether  
 516 (MTBE) and 2 mL of a KOH: methanol mixture (1 : 9, w : v). After over 10 h in  
 517 darkness, 2 mL of MTBE and 2 mL of distilled water were added to the mixture.  
 518 Then, the upper extract was collected and dried. This dried residue was  
 519 dissolved in 200  $\mu$ L of MTBE containing 0.1% BHT and filtered through 0.22  
 520  $\mu$ m filters. The filtered samples were automatically loaded into the reverse  
 521 phase HPLC system, which contained a carotene C30 column (250 mm  $\times$  4.6  
 522 mm, 5  $\mu$ m, YMC, Japan), at a flow rate of 1 mL/min. The gradient elution  
 523 method consisted of an initial 10 min of 71.2% acetonitrile, 23.8% methanol,  
 524 and 5.0% H<sub>2</sub>O, followed by a linear gradient of 19.5% acetonitrile, 6.5%  
 525 methanol, and 74.0% MTBE for 31 min. Data analysis was conducted with  
 526 Agilent ChemStation software.  $\beta$ -carotene was quantified using an external



standard.

## **Statistical analysis**

SPSS 17.0 software (SPSS, Inc.) was used for statistical analysis. Differences between treatments were evaluated using either Student's *t*-test or one-way ANOVA followed by Tukey's test for multiple comparisons. A *p* value of < 0.05 was considered statistically significant. All of the results are expressed as the means ± SEM.

## **Acknowledgements**

This work was funded by the Strategic Priority Research Program of the Chinese Academy of Sciences (CAS) (XDB11010200), National Key Plan for Scientific Research and Development of China (2016YFC1200603, 2017YFD0200406), Natural Science Foundation of China (NSFC 31430023, 31472051, 31672364, 31872302, 31802018), and Graduate Student Education Innovation Project of Shanxi Province (2016BY017).

## **Author contributions**

L.K., M.Y. and Y.W. designed the study; M.Y., Y.W. and Q.L. performed and analyzed the biological experiments; J.Z., Z.L., F.J., H.W. and X.G. contributed reagents/materials/analysis tools; M.Y., L.K., Y.W. and Q.L. wrote the manuscript.

## **Author ORCIDs**

Le Kang, <http://orcid.org/0000-0003-4262-2329>

Jianzhen Zhang, <https://orcid.org/0000-0003-3400-0044>

## Declaration of Interests

The authors declare no competing interests.

## References

- Applebaum SW**, Avisar E, Heifetz Y. 1997. Juvenile hormone and locust phase. *Archives of Insect Biochemistry and Physiology* **35**: 375-391. doi:10.1002/(Sici)1520-6327(1997)35:4<375::Aid-Arch3>3.0.Co;2-R, PMID: ISI:A1997XG47400003
- Avalos J**, Limon MC. 2015. Biological roles of fungal carotenoids. *Current Genetics* **61**: 309-324. doi:10.1007/s00294-014-0454-x, PMID: WOS:000358180000009
- Bell RC**, Webster GN, Whiting MJ. 2017. Breeding biology and the evolution of dynamic sexual dichromatism in frogs. *Journal of evolutionary biology* **30**: 2104-2115. doi:10.1111/jeb.13170, PMID: 28833835
- Bhosale P**, Bernstein PS. 2007. Vertebrate and invertebrate carotenoid-binding proteins. *Archives of biochemistry and biophysics* **458**: 121-127. doi:10.1016/j.abb.2006.10.005, PMID: 17188641
- Bolger AM**, Lohse M, Usadel B. 2014. Trimmomatic: a flexible trimmer for Illumina sequence data. *Bioinformatics* **30**: 2114-2120. doi:10.1093/bioinformatics/btu170, PMID: 24695404
- Bryon A**, Kurlovs AH, Dermauw W, Greenhalgh R, Riga M, Grbic M, Tirry L, Osakabe M, Vontas J, Clark RM, Van Leeuwen T. 2017. Disruption of a horizontally transferred phytoene desaturase abolishes carotenoid accumulation and diapause in *Tetranychus urticae*. *Proceedings of the National Academy of Sciences of the United States of America* **114**: E5871-E5880. doi:10.1073/pnas.1706865114, PMID: 28674017
- Burmeister SS**, Jarvis ED, Fernald RD. 2005. Rapid behavioral and genomic responses to social opportunity. *PLoS biology* **3**: e363. doi:10.1371/journal.pbio.0030363, PMID: 16216088
- Caro T**. 2009. Contrasting coloration in terrestrial mammals. *Philosophical transactions of the Royal Society of London. Series B, Biological sciences* **364**: 537-548. doi:10.1098/rstb.2008.0221, PMID: 18990666
- Caro T**, Sherratt TN, Stevens M. 2016. The ecology of multiple colour defences. *Evolutionary Ecology* **30**: 797-809. doi:10.1007/s10682-016-9854-3, PMID: WOS:000383769100001
- Cooke TF**, Fischer CR, Wu P, Jiang TX, Xie KT, Kuo J, Doctorov E, Zehnder A, Khosla C, Chuong CM, Bustamante CD. 2017. Genetic Mapping and Biochemical Basis of Yellow Feather Pigmentation in Budgerigars. *Cell* **171**: 427-439 e421. doi:10.1016/j.cell.2017.08.016, PMID: 28985565
- Cuthill IC**, Allen WL, Arbuckle K, Caspers B, Chaplin G, Hauber ME, Hill GE, Jablonski NG, Jiggins CD, Kelber A, Mappes J, Marshall J, Merrill R, Osorio D,

- Prum R, Roberts NW, Roulin A, Rowland HM, Sherratt TN, Skelhorn J, Speed MP, Stevens M, Stoddard MC, Stuart-Fox D, Talas L, Tibbetts E, Caro T. 2017. The biology of color. *Science* **357**: 470-477. doi:10.1126/science.aan0221, PMID: 28774901
- D'Orazio JA**, Nobuhisa T, Cui R, Arya M, Spry M, Wakamatsu K, Igras V, Kunisada T, Granter SR, Nishimura EK, Ito S, Fisher DE. 2006. Topical drug rescue strategy and skin protection based on the role of Mc1r in UV-induced tanning. *Nature* **443**: 340-344. doi:10.1038/nature05098, PMID: 16988713
- Duarte RC**, Flores AAV, Stevens M. 2017. Camouflage through colour change: mechanisms, adaptive value and ecological significance. *Philosophical transactions of the Royal Society of London. Series B, Biological sciences* **372**. doi:10.1098/rstb.2016.0342, PMID: 28533459
- Duarte RC**, Stevens M, Flores AA. 2016. Shape, colour plasticity, and habitat use indicate morph-specific camouflage strategies in a marine shrimp. *Bmc Evolutionary Biology* **16**: 218. doi:10.1186/s12862-016-0796-8, PMID: 27756220
- Futahashi R**, Fujiwara H. 2008. Juvenile hormone regulates butterfly larval pattern switches. *Science* **319**: 1061. doi:10.1126/science.1149786, PMID: 18292334
- Futahashi R**, Kurita R, Mano H, Fukatsu T. 2012. Redox alters yellow dragonflies into red. *Proceedings of the National Academy of Sciences of the United States of America* **109**: 12626-12631. doi:10.1073/pnas.1207114109, PMID: 22778425
- Goodwin TW**. 1952. The Biochemistry of Locust Pigmentation. *Biological Reviews* **27**: 439-460. doi:10.1111/j.1469-185X.1952.tb01514.x, PMID: ISI:A1952UX07900004
- Goodwin TW**, Srisukh S. 1951. Biochemistry of Locusts; The Green Pigment of the Haemolymph and Integument of Solitary Locusts (*Locusta-Migratoria-Migratorioides*, R and F, and *Schistocerca-Gregaria*, Forsk). *Biochemical Journal* **48**: 199-203. PMID: 14820828
- Guo W**, Wang XH, Ma ZY, Xue LA, Han JY, Yu D, Kang L. 2011. CSP and Takeout Genes Modulate the Switch between Attraction and Repulsion during Behavioral Phase Change in the Migratory Locust. *Plos Genetics* **7**. doi:10.1371/journal.pgen.1001291, PMID: 21304893
- Hemmi JM**, Marshall J, Pix W, Vorobyev M, Zeil J. 2006. The variable colours of the fiddler crab *Uca vomeris* and their relation to background and predation. *Journal of Experimental Biology* **209**: 4140-4153. doi:10.1242/jeb.02483, PMID: 17023607
- Henderson AJ**, Lasselin J, Lekander M, Olsson MJ, Powis SJ, Axelsson J, Perrett DI. 2016. Skin colour changes during experimentally-induced sickness. *Brain Behav Immun*. doi:10.1016/j.bbi.2016.11.008, PMID: 27847284
- Hubbard JK**, Uy JA, Hauber ME, Hoekstra HE, Safran RJ. 2010. Vertebrate pigmentation: from underlying genes to adaptive function. *Trends in Genetics* **26**: 231-239. doi:10.1016/j.tig.2010.02.002, PMID: 20381892
- Kang L**, Chen X, Zhou Y, Liu B, Zheng W, Li R, Wang J, Yu J. 2004. The analysis of large-scale gene expression correlated to the phase changes of the migratory locust. *Proceedings of the National Academy of Sciences of the United States of America*

633       **101**: 17611-17615. doi:10.1073/pnas.0407753101, PMID: 15591108

634       **Ma ZY**, Guo W, Guo XJ, Wang X, Kang L. 2011. Modulation of behavioral phase

635       changes of the migratory locust by the catecholamine metabolic pathway.

636       *Proceedings of the National Academy of Sciences of the United States of America*

637       **108**: 3882-3887. doi:10.1073/pnas.1015098108, PMID: 21325054

638       **Mathger LM**. 2003. Rapid colour changes in multilayer reflecting stripes in the

639       paradise whiptail, *Pentapodus paradiseus*. *Journal of Experimental Biology* **206**:

640       3607-3613. doi:10.1242/jeb.00599, PMID: 12966052

641       **McGraw KJ**. 2006. Sex steroid dependence of carotenoid-based coloration in female

642       zebra finches. *Physiology & Behavior* **88**: 347-352.

643       doi:10.1016/j.physbeh.2006.04.003, PMID: 16740280

644       **Moran NA**, Jarvik T. 2010. Lateral transfer of genes from fungi underlies carotenoid

645       production in aphids. *Science* **328**: 624-627. doi:10.1126/science.1187113,

646       PMID: 20431015

647       **Mundy NI**, Stapley J, Bennison C, Tucker R, Twyman H, Kim KW, Burke T, Birkhead

648       TR, Andersson S, Slate J. 2016. Red Carotenoid Coloration in the Zebra Finch Is

649       Controlled by a Cytochrome P450 Gene Cluster. *Current Biology* **26**: 1435-1440.

650       doi:10.1016/j.cub.2016.04.047, PMID: 27212402

651       **Pener MP**. 1991. Locust Phase Polymorphism and its Endocrine Relations. *Advances*

652       *in Insect Physiology* **23**: 1-79. doi:10.1016/s0065-2806(08)60091-0, PMID:

653       ISI:A1991MC40700001

654       **Pener MP**, Simpson SJ. 2009. Locust Phase Polyphenism: An Update. *Advances in*

655       *Insect Physiology* **36**: 1-272. doi:10.1016/S0065-2806(08)36001-9, PMID:

656       WOS:000273300400001

657       **Sakudoh T**, Nakashima T, Kuroki Y, Fujiyama A, Kohara Y, Honda N, Fujimoto H,

658       Shimada T, Nakagaki M, Banno Y, Tsuchida K. 2011. Diversity in copy number and

659       structure of a silkworm morphogenetic gene as a result of domestication. *Genetics*

660       **187**: 965-976. doi:10.1534/genetics.110.124982, PMID: 21242537

661       **Sakudoh T**, Sezutsu H, Nakashima T, Kobayashi I, Fujimoto H, Uchino K, Banno Y,

662       Iwano H, Maekawa H, Tamura T, Kataoka H, Tsuchida K. 2007. Carotenoid silk

663       coloration is controlled by a carotenoid-binding protein, a product of the Yellow

664       blood gene. *Proceedings of the National Academy of Sciences of the United States*

665       *of America* **104**: 8941-8946. doi:10.1073/pnas.0702860104, PMID: 17496138

666       **Simoës PM**, Ott SR, Niven JE. 2016. Environmental Adaptation, Phenotypic Plasticity,

667       and Associative Learning in Insects: The Desert Locust as a Case Study.

668       *Integrative and Comparative Biology* **56**: 914-924. doi:10.1093/icb/icw100,

669       PMID: 27549202

670       **Stuart-Fox D**, Moussalli A. 2008. Selection for social signalling drives the evolution

671       of chameleon colour change. *PLoS biology* **6**: e25.

672       doi:10.1371/journal.pbio.0060025, PMID: 18232740

673       **Sword GA**. 2002. A role for phenotypic plasticity in the evolution of aposematism.

674       *Proceedings. Biological sciences* **269**: 1639-1644. doi:10.1098/rspb.2002.2060,

675       PMID: 12204123

676       **Tabadkani SM**, Ahsaei SM, Hosseininaveh V, Nozari J. 2013. Food stress prompts

677 dispersal behavior in apterous pea aphids: do activated aphids incur energy loss?  
678 *Physiology & Behavior* **110**: 221-225. doi:10.1016/j.physbeh.2012.12.004, PMID:  
679 23262143

680 **Tabunoki H**, Sugiyama H, Tanaka Y, Fujii H, Banno Y, Jouni ZE, Kobayashi M, Sato  
681 R, Maekawa H, Tsuchida K. 2002. Isolation, characterization, and cDNA sequence  
682 of a carotenoid binding protein from the silk gland of *Bombyx mori* larvae. *The*  
683 *Journal of biological chemistry* **277**: 32133-32140. doi:10.1074/jbc.M204507200,  
684 PMID: 12052833

685 **Tanaka S**. 1993. Hormonal Deficiency Causing Albinism in *Locusta-Migratoria*.  
686 *Zoological Science* **10**: 467-471. PMID: ISI:A1993LN37500010

687 **Tanaka S**. 2000. The role of [His(7)]-corazonin in the control of body-color  
688 polymorphism in the migratory locust, *Locusta migratoria* (Orthoptera : Acrididae).  
689 *Journal of Insect Physiology* **46**: 1169-1176. doi:Doi 10.1016/S0022-  
690 1910(99)00228-0, PMID: 10818224

691 **Teyssier J**, Saenko SV, van der Marel D, Milinkovitch MC. 2015. Photonic crystals  
692 cause active colour change in chameleons. *Nature communications* **6**: 6368.  
693 doi:10.1038/ncomms7368, PMID: 25757068

694 **Toews DPL**, Hofmeister NR, Taylor SA. 2017. The Evolution and Genetics of  
695 Carotenoid Processing in Animals. *Trends in Genetics* **33**: 171-182.  
696 doi:10.1016/j.tig.2017.01.002, PMID: 28174022

697 **Valverde JP**, Schielzeth H. 2015. What triggers colour change? Effects of background  
698 colour and temperature on the development of an alpine grasshopper. *Bmc*  
699 *Evolutionary Biology* **15**. doi:10.1186/s12862-015-0419-9, PMID: 26293296

700 **Wang W**, Huang MH, Dong XL, Chai CL, Pan CX, Tang H, Chen YH, Dai FY, Pan  
701 MH, Lu C. 2014. Combined effect of Cameo2 and CBP on the cellular uptake of  
702 lutein in the silkworm, *Bombyx mori*. *Plos One* **9**: e86594.  
703 doi:10.1371/journal.pone.0086594, PMID: 24475153

704 **Wang X**, Fang X, Yang P, Jiang X, Jiang F, Zhao D, Li B, Cui F, Wei J, Ma C, Wang Y,  
705 He J, Luo Y, Wang Z, Guo X, Guo W, Wang X, Zhang Y, Yang M, Hao S, Chen B,  
706 Ma Z, Yu D, Xiong Z, Zhu Y, Fan D, Han L, Wang B, Chen Y, Wang J, Yang L, Zhao  
707 W, Feng Y, Chen G, Lian J, Li Q, Huang Z, Yao X, Lv N, Zhang G, Li Y, Wang J,  
708 Wang J, Zhu B, Kang L. 2014. The locust genome provides insight into swarm  
709 formation and long-distance flight. *Nature communications* **5**: 1-9.  
710 doi:10.1038/ncomms3957, PMID: 24423660

711 **Wang XH**, Kang L. 2014. Molecular mechanisms of phase change in locusts. *Annual*  
712 *Review of Entomology* **59**: 225-244. doi:10.1146/annurev-ento-011613-162019,  
713 PMID: 24160426

714 **Wu R**, Wu Z, Wang X, Yang P, Yu D, Zhao C, Xu G, Kang L. 2012a. Metabolomic  
715 analysis reveals that carnitines are key regulatory metabolites in phase transition of  
716 the locusts. *Proceedings of the National Academy of Sciences of the United States*  
717 *of America* **109**: 3259-3263. doi:10.1073/pnas.1119155109, PMID: 22328148

718 **Wu R**, Wu Z, Wang X, Yang P, Yu D, Zhao C, Xu G, Kang L. 2012b. Metabolomic  
719 analysis reveals that carnitines are key regulatory metabolites in phase transition of  
720 the locusts. *Proceedings of the National Academy of Sciences* **109**: 3259-3263.

doi:10.1073/pnas.1119155109, PMID: 22328148

**Xiong G**, Tong X, Gai T, Li C, Qiao L, Monteiro A, Hu H, Han M, Ding X, Wu S, Xiang Z, Lu C, Dai F. 2017. Body Shape and Coloration of Silkworm Larvae Are Influenced by a Novel Cuticular Protein. *Genetics* **207**: 1053-1066. doi:10.1534/genetics.117.300300, PMID: 28923848

**Yang ML**, Wei YY, Jiang F, Wang YL, Guo XJ, He J, Kang L. 2014. MicroRNA-133 inhibits behavioral aggregation by controlling dopamine synthesis in locusts. *Plos Genetics* **10**: e1004206. doi:10.1371/journal.pgen.1004206, PMID: 24586212

**Zhang L**, Mazo-Vargas A, Reed RD. 2017. Single master regulatory gene coordinates the evolution and development of butterfly color and iridescence. *Proceedings of the National Academy of Sciences of the United States of America* **114**: 10707-10712. doi:10.1073/pnas.1709058114, PMID: 28923944



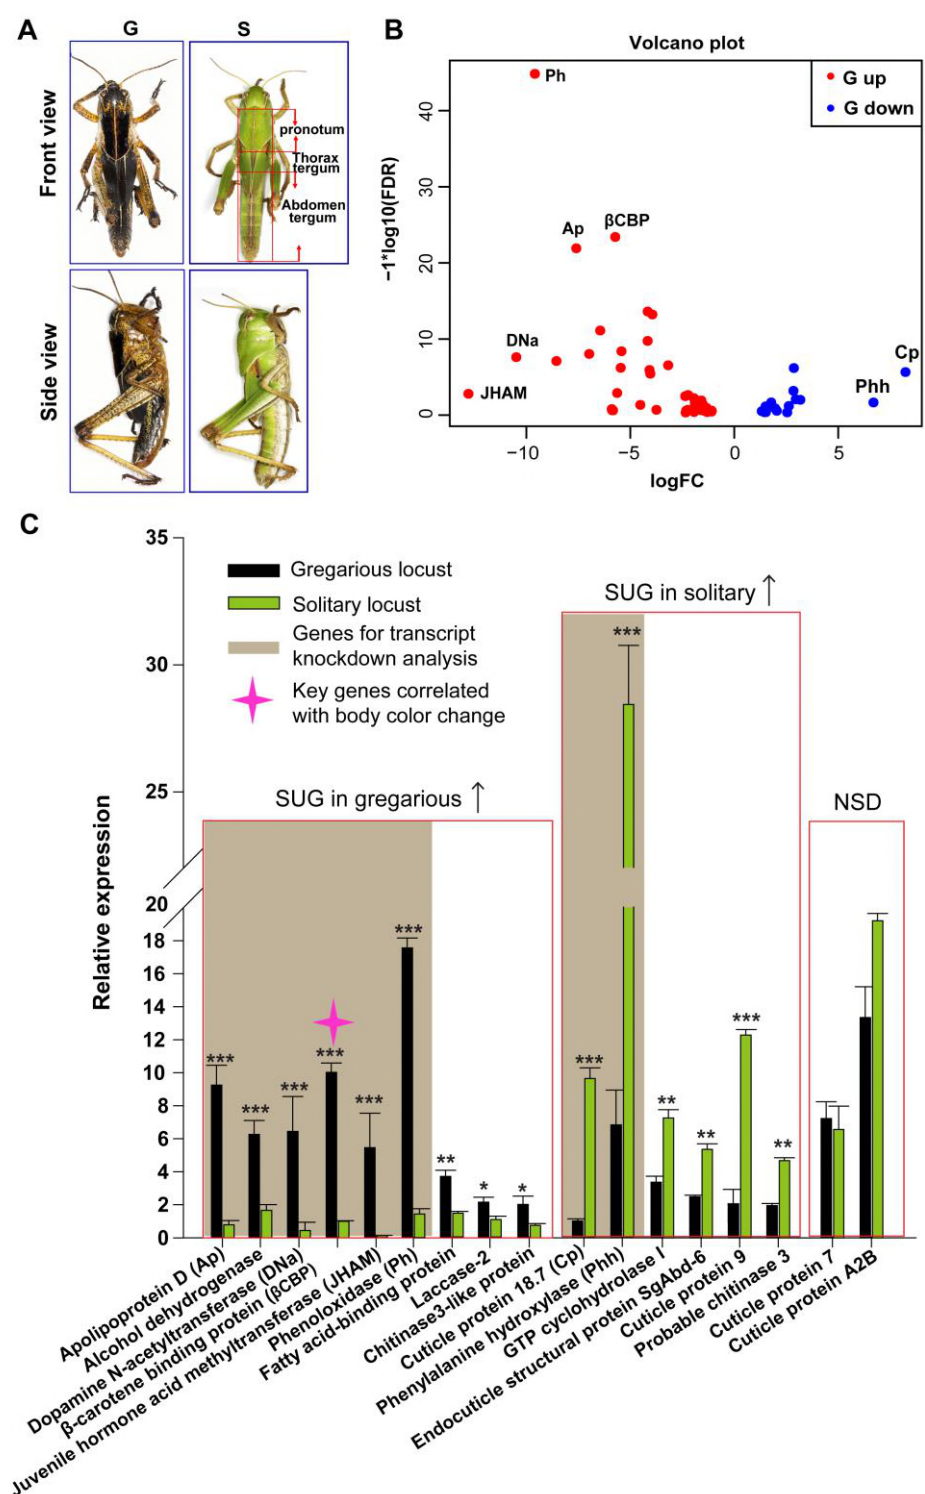

**Figure 1.** Identification of  $\beta$ -carotene-binding protein ( $\beta\text{CBP}$ ) as a target

associated with body color changes between gregarious and solitary locusts.

(A) Body colors of typical gregarious and solitary nymphs. The tergums include

pronotum, thorax tergum and abdomen tergum. (B) Logarithmic fold alterations of 68 differentially expressed genes (DEGs) associated with animal coloration between gregarious and solitary locusts are shown in the volcano plot diagram generated from genome-wide RNA-Seq. Red and blue dots indicate up- and down regulated genes, respectively, in the gregarious locusts ( $n = 3$  samples, 10 integuments/sample). (C) The top 17 DEGs ( $\text{Log FC} > 2.8$ ,  $\text{FDR} < 1e-5$ ) among the 68 genes from the volcano plot diagram were confirmed in the gregarious and solitary integuments via qPCR ( $n = 6$  samples; 8 integuments/sample; Student's  $t$ -test; red boxes indicate significantly up regulated genes (SUG) in gregarious/solitary locusts and no significant difference between gregarious and solitary locusts;  $*p < 0.05$ ;  $**p < 0.01$ ;  $***p < 0.001$ ). Brown shades denote the eight genes used for transcript knockdown analysis. The red star in the histogram indicate the identified target gene that correlates with body color change in the phase transition of locusts.

The following figure supplement is available for figure 1:

**Source data 1.** Numerical data that are represented as graphs in *Figure 1C*.

**Figure supplement 1. Transcriptomic profiles of locust pronotum integuments revealed by strand-specific RNA-seq.**

**Figure supplement 2.  $\beta$ CBP fosters the body color change from the gregarious pattern to the solitary pattern.**



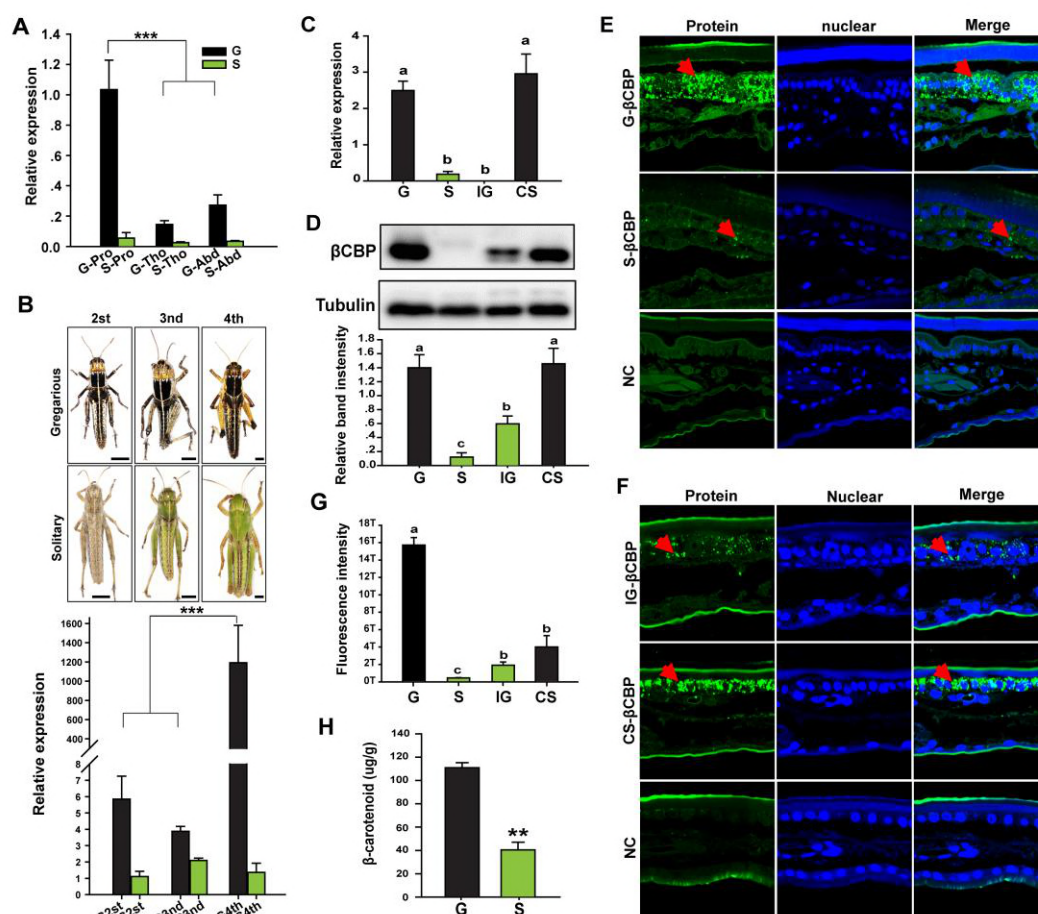

**Figure 2. Expression or distribution of  $\beta$ CBP and its binding  $\beta$ -carotene shows phase-specific patterns.** (A)  $\beta$ CBP expression in the tergums of different body segments of locusts in the gregarious (G) and solitary (S) phases. Pro: Pronotum; Tho: Thorax; Abd: Abdomen. (B)  $\beta$ CBP expression in the pronotums of different instars of gregarious (G) and solitary (S) nymphs. Body color phenotypes of typical gregarious and solitary nymphs in the second (2<sup>st</sup>), third (3<sup>rd</sup>), and fourth (4<sup>th</sup>) instar are shown. The scale is 2 mm for each nymph. mRNA expression of  $\beta$ CBP was quantified by using qRT-PCR. qPCR data are shown as the means  $\pm$  SEM (n = 6). \* $p$  < 0.05; \*\* $p$  < 0.01; \*\*\* $p$  < 0.001. (C, D)

mRNA (C) and protein (D) expression levels of  $\beta$ CBP were determined in the integuments of fourth-instar gregarious (G) nymphs, solitary (S) nymphs, gregarious nymphs after isolation (IG), and solitary nymphs after crowding (CS) using qPCR and Western blot analyses. (E) Distribution analysis of CBP was conducted to determine the localization and differences in abundance of CBP in the integuments between the gregarious (G) and solitary (S) locusts via immunohistochemistry. The red arrows indicate the areas where  $\beta$ CBP was localized in the locust integuments. NC, negative control. Images were visualized using an LSM 710 confocal fluorescence microscope (Zeiss) at a magnification of 40 $\times$ . (F) Expression signals for  $\beta$ CBP were analyzed in the integuments of gregarious nymphs after isolation (IG) and solitary nymphs after crowding (CS). (G) Fluorescence intensity was quantified using ZEN 2.1 software and expressed as the means  $\pm$  SEM (n = 3). (H)  $\beta$ -carotene content in the gregarious and solitary locust integuments was evaluated using HPLC. qPCR and HPLC data are shown as the mean  $\pm$  SEM (n = 6). Western blot bands were quantified using densitometry, and the values are expressed as the mean  $\pm$  SEM (n = 3); the same letter indicates that the data are not significantly different.

The following figure supplement is available for figure 2:

**Source data 1.** Numerical data that are represented as graphs in *Figure 2A*, *B*, *C*, *D*, *G*, *H*.

**Figure supplement 1.  $\beta$ CBP expression in the different tissues of**

**gregarious locusts as determined by qRT–PCR.**

**Figure supplement 2.  $\beta$ CBP expression in the time course of gregarious locusts.**

**Figure supplement 3.  $\beta$ CBP expression in the tergum of the thorax and abdomen of locusts.**

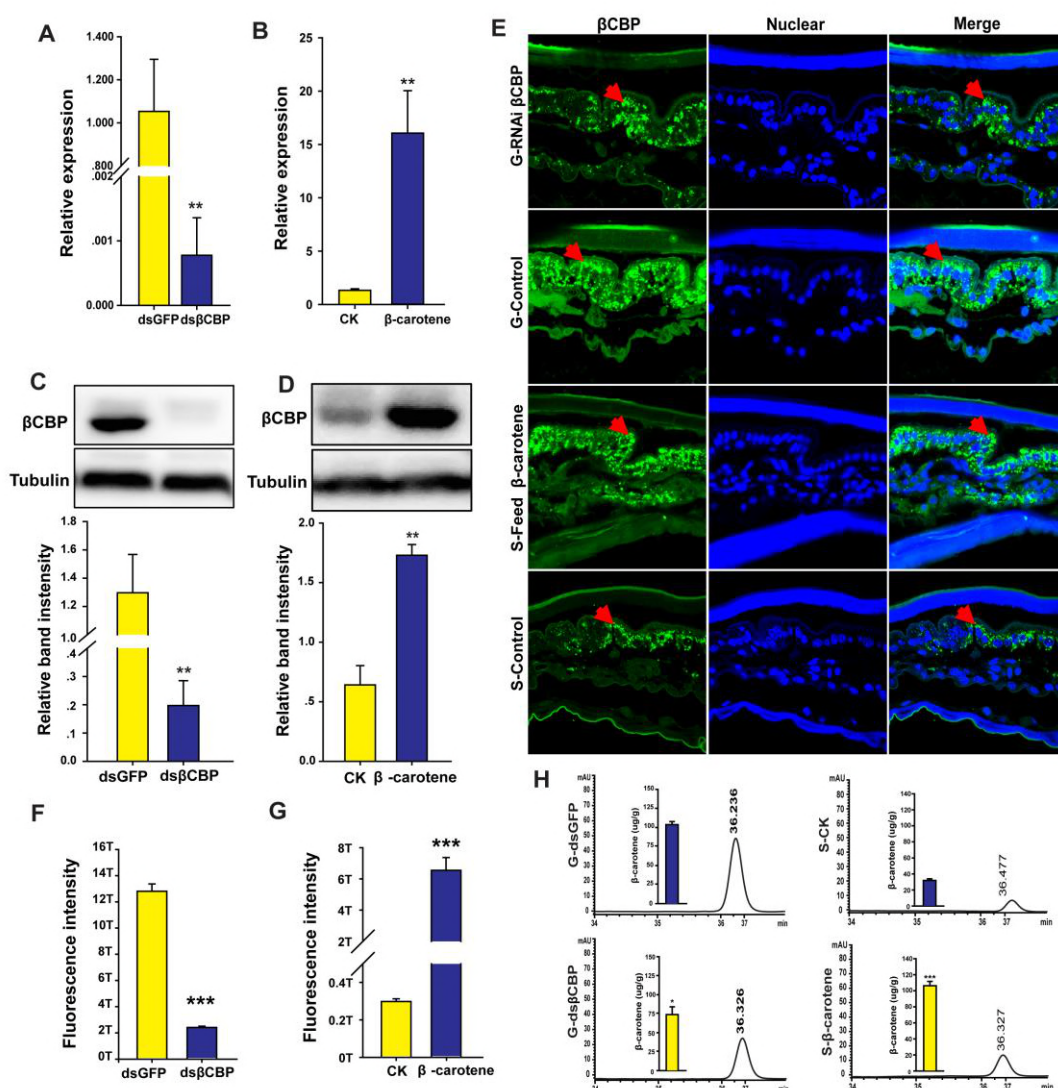

**Figure 3. βCBP accumulates β-carotene pigment to affect pigmentation in the phase transition of locusts.** (A, C) mRNA and protein expression of βCBP in the pronotum integument was quantified using qRT-PCR (A) and Western blot analyses (C) two stadiums after βCBP silencing and isolating in gregarious locusts. (B, D) mRNA and protein expression levels of βCBP in the pronotum integument were determined two stadiums after feeding with β-carotene and crowding in solitary locusts using qPCR (B) and Western blot analyses (D). (E) Fluorescence signals of βCBP were determined in gregarious (G) locusts after

$\beta$ CBP silencing coupled with isolation and in solitary (S) locusts after feeding with  $\beta$ -carotene diet coupled with crowding. (F, G) Fluorescence signal intensity of  $\beta$ CBP was quantified using ZEN 2.1 software and expressed as the means  $\pm$  SEM ( $n = 3$ ). (H)  $\beta$ -carotene content was evaluated in gregarious locusts after  $\beta$ CBP silencing coupled with isolation and in solitary locusts after feeding with  $\beta$ -carotene diet coupled with crowding by using HPLC. qPCR and HPLC data are shown as the means  $\pm$  SEM ( $n = 6$ ). Western blot bands were quantified using densitometry, and the values are expressed as the means  $\pm$  SEM ( $n = 3$ );  $*p < 0.05$ ;  $**p < 0.01$ ;  $***p < 0.001$ .

The following figure supplement is available for figure 3:

**Source data 1.** Numerical data that are represented as graphs in *Figure 3A, B, C, D, F, G, H*.

**Figure supplement 1.**  $\beta$ CBP expression in the tergum of the thorax and abdomen of locusts after RNAi  $\beta$ CBP.

**Figure supplement 2.**  $\beta$ CBP expression in the tergum of the thorax and abdomen of solitary locusts.

**Figure supplement 3.**  $\beta$ CBP expression in the pronotum of solitary locusts only pre-fed with  $\beta$ -carotene but no crowding by qRT-PCR.



879

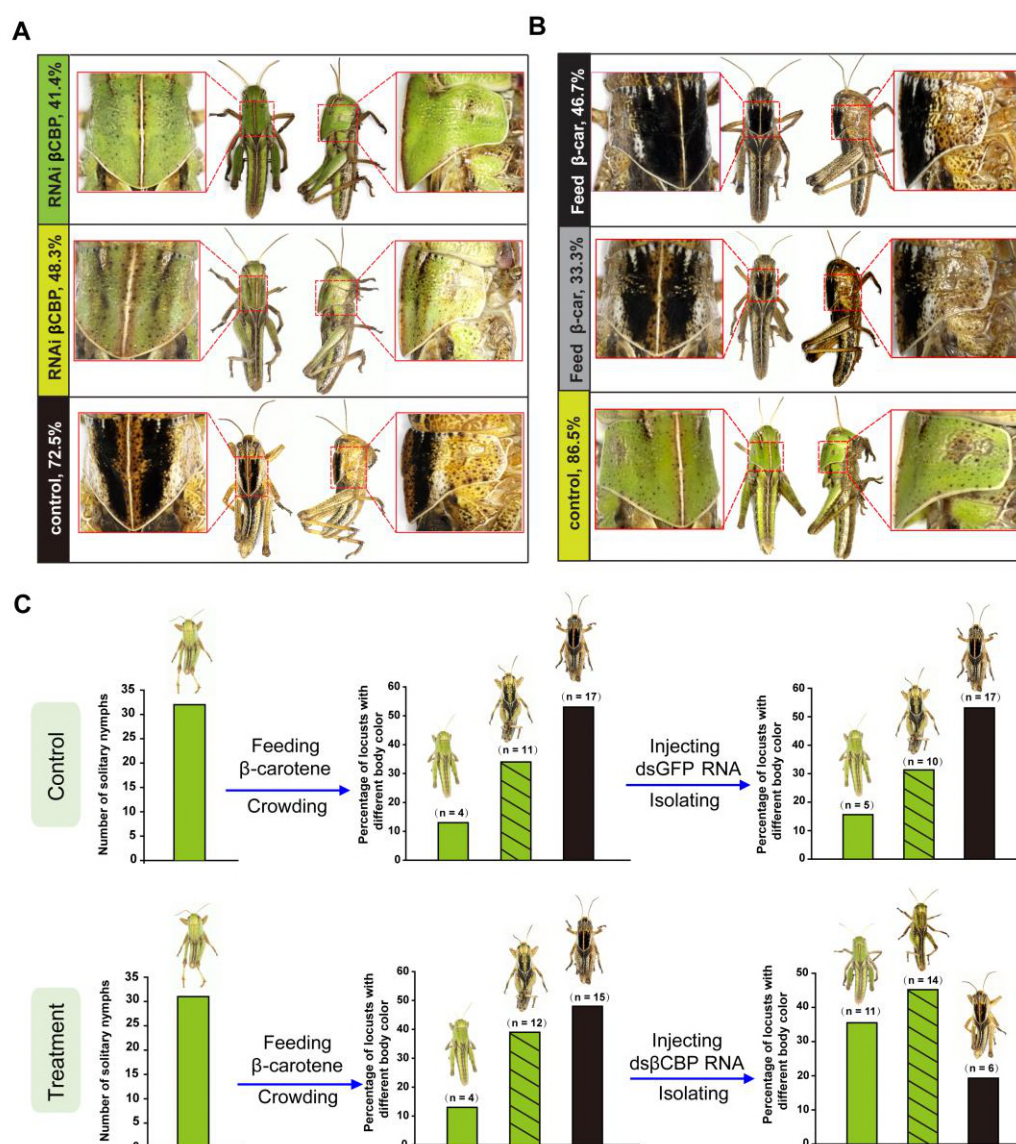

880

881 **Figure 4.  $\beta$ CBP and its binding of  $\beta$ -carotene fosters the body color phase**

882 **transition of the locust. (A) Effects of  $\beta$ CBP dsRNA treatment on the body**

883 **color of gregarious locusts. Each second-instar nymph was injected with 3  $\mu$ g**

884 **of dsRNA thrice and exposed to isolation. Control nymphs were injected with**

885 **equivalent volumes of dsGFP and then isolated. (B) Effects of  $\beta$ -carotene**

886 **feeding on the body color of solitary locusts. Solitary nymphs were fed a**

synthetic diet containing  $\beta$ -carotene and were then subjected to crowding. Control insects were fed a regular diet without  $\beta$ -carotene and were then subjected to crowding. (C) A body color rescue experiment in solitary locusts was performed by injecting dsRNA against  $\beta CBP$  at day 3 in third-instar nymphs (N3D3) that had been pretreated with  $\beta$ -carotene feeding at day 1 as second-instar nymphs (N2D1). The control group was injected with dsGFP as third-instar nymphs that had been pretreated with  $\beta$ -carotene feeding as second-instar nymphs.

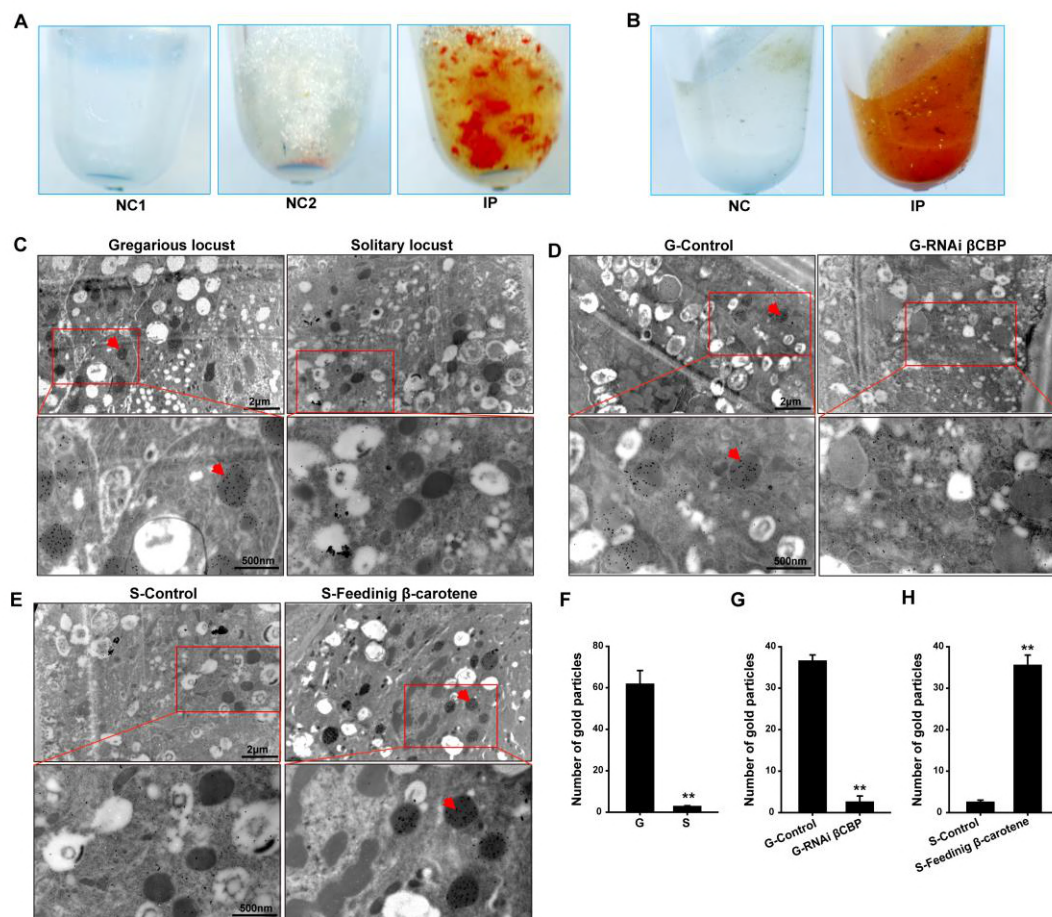

908

909 **Figure 5. The red complex of  $\beta$ CBP located in the pigment granules of**  
910 **integument and  $\beta$ CBP binding of  $\beta$ -carotene directly contributes to the**  
911 **black back pattern of gregarious locusts. (A) Red  $\beta$ CBP–pigment complex**  
912 **was confirmed by recombinant  $\beta$ CBP (r $\beta$ CBP) incubation with  $\beta$ -carotene under**  
913 **immunoprecipitation using  $\beta$ CBP antibody conjugated to protein A-Sepharose.**  
914 **NC1, containing  $\beta$ -carotene without r $\beta$ CBP; NC2, containing BSA and  $\beta$ -**  
915 **carotene; IP, containing  $\beta$ -carotene and r $\beta$ CBP. (B) Red pigment accumulates**  
916 **in the precipitate of the locust pronotum when treated with anti- $\beta$ CBP-**  
917 **immunoprecipitation compared with IgG-immunoprecipitation. NC, containing**  
918 **pronotums and IgG; IP, containing pronotums and  $\beta$ CBP antibody. (C) The**



subcellular distribution of  $\beta$ CBP was investigated in the integuments of gregarious and solitary locusts by immunoelectron microscopy. (D, E) Immunogold labeling signals of  $\beta$ CBP were comparatively analyzed in the integuments of gregarious locusts after injection with  $\beta$ CBP dsRNAs and subsequent isolation and (D) in the integuments of solitary integuments after feeding with  $\beta$ -carotene diet followed by crowding (E). (F, G, H) Average number of gold particles in three randomly selected pigment granules in sections from various treatments. Variation is calculated based on three biological replicates ( $n = 3$ ,  $**p < 0.01$ ). All sections were probed with anti- $\beta$ CBP, followed by protein A-gold conjugate. Images outlined with red squares are magnified at 30,000  $\times$  using the Ruli H-750 TEM (Japan). The red arrow indicates the gold particles of  $\beta$ CBP located in the pigment granules.

The following figure supplement is available for figure 5:

**Source data 1.** Numerical data that are represented as graphs in *Figure 5F, G, H*.

**Figure supplement 1. Confirmation of  $\beta$ CBP binding to  $\beta$ -carotene via HPLC.**

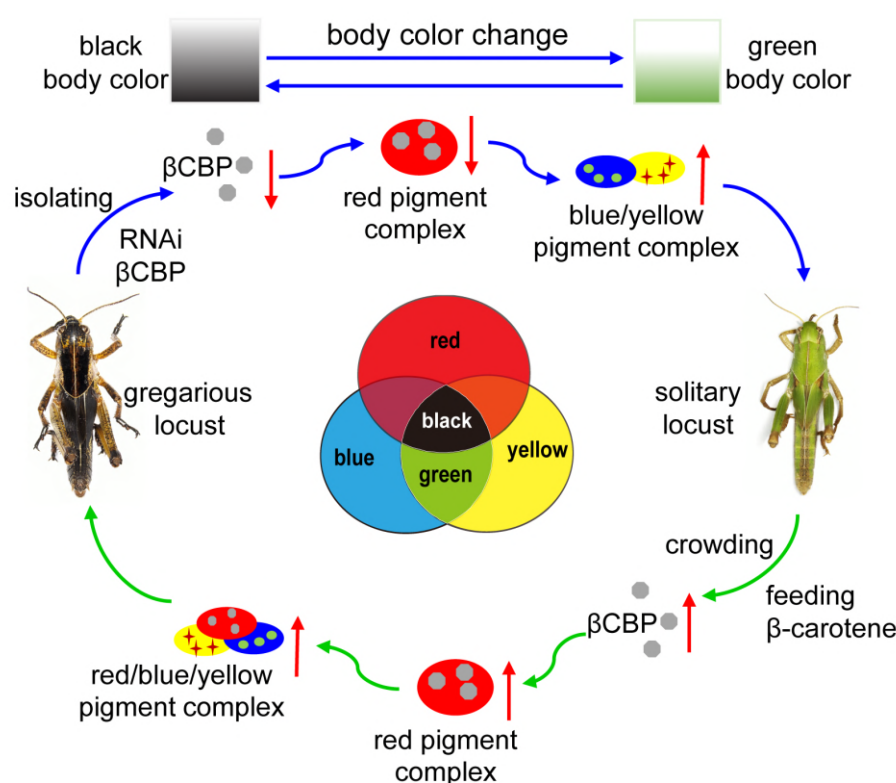

**Figure 6.** Model of a new mechanism in accordance with the physically trichromatic rule. Body color change is mediated by the red  $\beta$ CBP– $\beta$ -carotene complex, which has a superposition effect on the solitary green background and produces the black back pattern of gregarious locusts. Silencing  $\beta$ CBP in gregarious locusts reduced the red color pigment  $\beta$ -carotene complex, thereby leading to the green pattern (instead of black). By contrast, feeding the solitary locusts  $\beta$ -carotene induced  $\beta$ CBP expression and caused gregarious-like body coloration.

The following figure supplement is available for figure 6:

**Figure supplement 1. Biliverdin-binding protein and carotene-binding protein expression in the pronotum of gregarious and solitary locusts by qRT-PCR.**

954

955 **Additional files**

956 **Supplementary files**

957 **Supplementary files 1. Primers used in the qPCR analysis of *βCBP*, and**

958 ***actin* and *GFP* used for RNA interference**

959 **Supplementary files 2. Composition of the basic synthetic diet**

960

961
